# Supplementary material for: Ocular Surface Characteristics in Pugs with Pigmentary Keratitis in the Canary Islands, Spain
Source: MDPI journal article supplement (doi:10.3390/ani14040580), 2024-02-09
Supplement: s1 [file s1]

## 9. ANEXOS

### Anexo I

#### **ESTUDIO SOBRE LA QUERATITIS PIGMENTARIA EN PUG CARLINO**

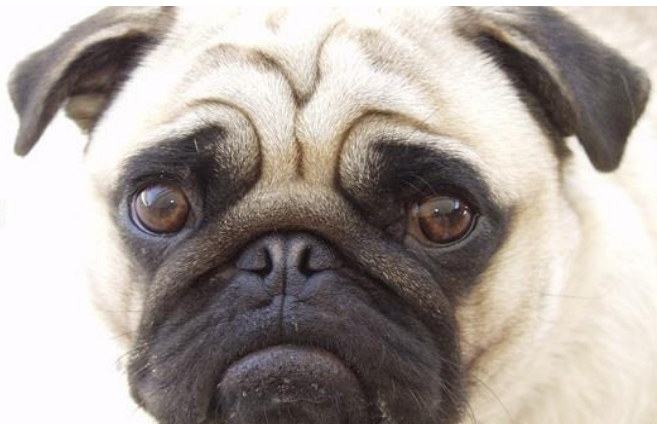

Estimad@ compañer@,

Queremos informarte de la realización de una Tesis doctoral, sobre una alteración ocular muy frecuente en los perros de raza Pug, “la queratitis pigmentaria”.

El objetivo es estudiar la prevalencia, factores predisponentes y signos clínicos de la queratitis pigmentaria en perros de raza Pug, y comparar dos tratamientos inmunosupresores tópicos.

Se les realizará una **exploración oftalmológica gratuita** a todos los Pugs que deseen participar. Si finalmente presentan la alteración podrán ser tratados médicamente **sin coste**, con uno de los dos medicamentos. El estudio durará aproximadamente 6 meses.

La queratitis pigmentaria es una alteración de la córnea en la cual se acumula pigmento, sus causas son multifactoriales entre ellas:

- 1-La exposición corneal crónica.**
- 2-Las alteraciones de la película lagrimal** (queratoconjuntivitis seca).
- 3-La sensibilidad corneal disminuida.**
- 4-Irritaciones por fricción** (entropion, distiquias, triquiasis...).

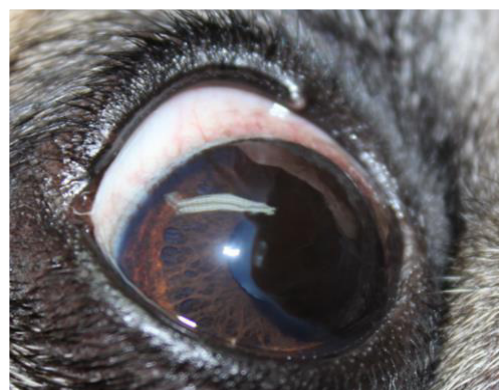

Si tienes algún paciente que pueda beneficiarse pide cita en: [dioftalmoanimal@gmail.com](mailto:dioftalmoanimal@gmail.com)  
Teléfono: \*\*\*\*\*

Muchas gracias por la colaboración.  
Atentamente,  
Diana Sarmiento Quintana, COL. 1032.  
Inmaculada Morales Fariña, COL. 85.

**Anexo II**

Queratitis pigmentaria (PK) en raza Pug

Fecha:     /     /

**RESEÑA:**

|                                     |            |   |
|-------------------------------------|------------|---|
| Nombre                              |            |   |
| Numero de historial /Identificación |            |   |
| Propietario/ teléfono               |            | / |
| Edad:                               | 0-5 años   |   |
|                                     | 5-10 años  |   |
|                                     | 10-15 años |   |
| Fecha de nacimiento:                |            |   |

|                                       |              |  |
|---------------------------------------|--------------|--|
| Sexo                                  | Macho:       |  |
|                                       | Hembra:      |  |
| Castrado                              | Sí :         |  |
|                                       | No:          |  |
| Capa<br><br>*Foto del animal completo | Plata:       |  |
|                                       | Albaricoque: |  |
|                                       | Leonado:     |  |
|                                       | Negro :      |  |

**ANTECEDENTES CLINICOS:**

|                                        |                         |                                     |                        |        |
|----------------------------------------|-------------------------|-------------------------------------|------------------------|--------|
| OCULARES                               | Enfermedades anteriores | <b>Ojo derecho</b>                  | Sí                     | ¿Cuál? |
|                                        |                         |                                     | No                     |        |
|                                        |                         | <b>Ojo izquierdo</b>                | Sí                     | ¿Cuál? |
|                                        |                         |                                     | No                     |        |
|                                        | Tratamiento anterior    | Sí                                  | ¿Cuál?<br><br>¿Cuándo? |        |
|                                        |                         | Médicos<br><input type="checkbox"/> |                        |        |
| Quirúrgico<br><input type="checkbox"/> |                         |                                     |                        |        |
|                                        | No                      |                                     |                        |        |

|            |    |        |
|------------|----|--------|
| SISTEMICOS | Sí | ¿Cuál? |
|            | No |        |

**CÓRNEA: Pigmento que ocupa la córnea**

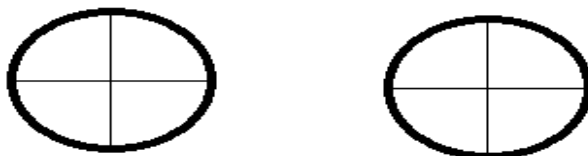

**EXPLORACIÓN DEL SEGMENTO ANTERIOR Y ANEJOS:**

|                                                              |                                                    | OJO DERECHO   |           | OJO IZQUIERDO |  |
|--------------------------------------------------------------|----------------------------------------------------|---------------|-----------|---------------|--|
| % DE PIGMENTO<br>QUE OCUPA LA<br>CÓRNEA<br>*foto de los ojos | Ausencia de PK                                     |               |           |               |  |
|                                                              | Muy leve                                           | _____ %       |           | _____ %       |  |
|                                                              | Leve < 20%                                         | _____ %       |           | _____ %       |  |
|                                                              | Moderada 20-50 %                                   | _____ %       |           | _____ %       |  |
|                                                              | Severa > 50 %                                      | _____ %       |           | _____ %       |  |
| VASCULARIZACIÓN                                              | SI/NO                                              |               |           |               |  |
| ANOMALIAS<br>PALPEBRALES<br><br>Sí/No                        | Euribléfaron                                       |               |           |               |  |
|                                                              | Triquiasis del<br>pliegue nasal                    |               |           |               |  |
|                                                              | Triquiasis de la<br>carúncula                      |               |           |               |  |
|                                                              | Distiquiasis/<br>distriquiasis<br>( Poner cuantas) |               | Superior: | Superior:     |  |
|                                                              |                                                    |               | Inferior: | Inferior:     |  |
|                                                              | Entropión<br>nasal                                 | Superior      |           |               |  |
|                                                              |                                                    | Inferior      |           |               |  |
|                                                              | Otras:                                             |               |           |               |  |
| LÁGRIMA                                                      | Test de Schirmer (STT)                             | mm/min        |           | mm/min        |  |
|                                                              |                                                    | 0-5<br>mm/min |           | 0-5<br>mm/min |  |

|                         |                       |            |                    |  |                    |  |
|-------------------------|-----------------------|------------|--------------------|--|--------------------|--|
|                         | CUATITATIVA           |            | 5-10 mm/min        |  | 5-10 mm/min        |  |
|                         |                       |            | 10-15 mm/min       |  | 10-15 mm/min       |  |
|                         |                       |            | 15-20 mm/min       |  | 15-20 mm/min       |  |
|                         |                       |            | 20-25 mm/min       |  | 20-25 mm/min       |  |
|                         | Test de Ferning (TFT) |            |                    |  |                    |  |
|                         | Break-up time (BUT)   |            | Segundos           |  | Segundos           |  |
|                         | CUALITATIVA           |            | Test fluoresceína: |  | Test fluoresceína: |  |
|                         |                       |            | 0-5 s              |  | 0-5 s              |  |
|                         |                       |            | 5-10 s             |  | 5-10 s             |  |
|                         |                       |            | 10-15 s            |  | 10-15 s            |  |
|                         |                       |            | 15-20 s            |  | 15-20 s            |  |
| SENSIBILIDAD CORNEAL    | Fina                  | Negativa   |                    |  |                    |  |
|                         |                       | Disminuida |                    |  |                    |  |
|                         |                       | Positiva   |                    |  |                    |  |
|                         | Gruesa                | Negativa   |                    |  |                    |  |
|                         |                       | Disminuida |                    |  |                    |  |
|                         |                       | Positiva   |                    |  |                    |  |
| PAQUIMETRÍA ULTRASÓNICA | Zona medial           |            |                    |  |                    |  |
|                         | Zona lateral          |            |                    |  |                    |  |

|        |                     | OJO DERECHO | OJO IZQUIERDO |
|--------|---------------------|-------------|---------------|
| IRIS : | ATROFIA/ HIPOPLASIA |             |               |
|        | PPMs: Poner tipo    |             |               |
| OTRAS: |                     |             |               |

## Anexo III

**UNIVERSIDAD DE LAS PALMAS DE GRAN CANARIA**

**FACULTAD DE VETERINARIA**

### **HOJA DE CONSENTIMIENTO PARA PARTICIPACIÓN EN ESTUDIO DE INVESTIGACIÓN**

**Título:** Estudio sobre la queratitis pigmentaria en perros de raza Pug. Comparación de dos tratamientos inmunosupresores tópicos.

**Investigador:** Diana Sarmiento Quintana

**Tutor:** Inmaculada Morales Fariña

**Lugar:** Hospital Clínico Veterinario de la ULPGC

#### **I- INTRODUCCIÓN**

Usted ha sido invitado a participar en un estudio clínico. Antes de decidir la participación de su mascota en el estudio por favor lea este consentimiento cuidadosamente. Haga todas las preguntas que usted tenga, para asegurarse de que entienda los procedimientos del estudio.

#### **II- PROPÓSITO DEL ESTUDIO:**

La queratitis pigmentaria es una enfermedad ocular muy frecuente en perros de raza Pug, donde el pigmento invade la córnea progresivamente pudiendo provocar pérdida de visión.

El propósito de este estudio es comparar la eficacia de dos tratamientos tópicos, su mascota será tratada con uno de los tratamientos.

#### **III- PARTICIPANTES DEL ESTUDIO:**

El estudio es completamente voluntario. Participan aproximadamente 30 perros de raza Pug.

#### **IV- PROCEDIMIENTOS:**

El propietario debe poner a su mascota el tratamiento indicado durante un mínimo de 6 meses, tres veces al día.

En este periodo se harán revisiones periódicas, para monitorizar la retirada del pigmento de la córnea, el espesor de la misma y la cantidad y calidad de la lágrima.

#### **V-RIESGOS O INCOMODIDADES:**

No hay riesgos especiales que conozcamos en la utilización de la mediación tópica las propias de cualquier medicamento. El propietario entiende los riesgos que puedan ocurrir.

### VI- BENEFICIOS

Se espera que el tratamiento tópico frene el avance del pigmento, mejore los signos de inflamación y la cantidad y calidad de la lágrima.

### VII- COSTOS

El tratamiento tópico para la queratitis pigmentaria será gratuito, no obstante, si el animal tiene una infección previa será el propietario quien abone la medicación necesaria.

### X- PRIVACIDAD Y CONFIDENCIALIDAD

El propietario presta además libremente su conformidad para que se recoja, almacene y analice la información, sobre la salud de su mascota para el propósito de este estudio, sin que revele su identidad personal.

### XIV- PREGUNTAS

Si tiene alguna pregunta sobre este estudio o sobre su participación en el mismo, usted puede contactar a: *Diana*: \*\*\*\*\*

### XV- CONSENTIMIENTO:

He leído la información de esta hoja de consentimiento, o se me ha leído de manera adecuada. Todas mis preguntas sobre el estudio y mi participación han sido atendidas.

Yo autorizo el uso y la divulgación de la información sobre la salud de mi mascota. Presto libremente mi conformidad para participar en el estudio.

Al firmar esta hoja de consentimiento, no se ha renunciado a ninguno de los derechos legales.

Don/Doña \_\_\_\_\_ que afirma ser el dueño  
de la mascota \_\_\_\_\_ con microchip \_\_\_\_\_

\_\_\_\_\_  
DNI:

Firma del Participante

\_\_\_\_\_  
Fecha

## Anexo IV

### INSTRUCCIONES PARA EL PROPIETARIO:

Tratamiento:

-Tobrex colirio: 1-1-1 en ambos ojos 7 días y retirar

-Tacrolimus o sirolimus: 1-1-1 en ambos ojos INDEFINIDO. TENER ESTE PRODUCTO EN LA NEVERA Y PROTEGIDO DE LA LUZ

NO utilice ningún otro producto que no esté incluido en este estudio (Por ejemplo: lagrimas artificiales u otros colirios ...) sin hablar previamente con Diana Sarmiento Quintana, teléfono: \*\*\*\*\*

Si se observan legañas SÍ se puede limpiar previamente con suero fisiológico.

Aplíquese el colirio de la siguiente manera:

1. Lávese las manos antes de abrir el envase.
2. Agite el envase
3. Inclíne la cabeza del perro hacia atrás y que mire hacia arriba.
4. Tire suavemente hacia abajo del párpado inferior, hasta que haga un pequeño hueco.
5. Apriete el envase invertido para que caiga una gota en cada ojo. Para evitar la contaminación no permita que la punta del gotero toque los pelos del animal o cualquier otra superficie. Tape el envase y vuelva a introducirlo en el cilindro de plástico para que el producto este protegido de la luz.
6. La primera semana junto al Tobrex colirio. Esperar cinco minutos entre los dos productos.

Si cree que una gota cayó fuera del ojo repita la operación.

Control telefónico con cualquier incidencia.

## Anexo V

## REVISIONES

Fecha:     /     /

## RESEÑA:

|                       |  |
|-----------------------|--|
| Nombre                |  |
| Identificación        |  |
| Propietario/ teléfono |  |

## PRODUCTO:

## OD

## OS

| LÁGRIMA                      | Test de Schirmer (STT) | mm/min             |  | mm/min             |  |
|------------------------------|------------------------|--------------------|--|--------------------|--|
|                              |                        | 0-5 mm/min         |  | 0-5 mm/min         |  |
| CUATITATIVA                  |                        | 5-10 mm/min        |  | 5-10 mm/min        |  |
|                              |                        | 10-15 mm/min       |  | 10-15 mm/min       |  |
|                              |                        | 15-20 mm/min       |  | 15-20 mm/min       |  |
|                              |                        | 20-25 mm/min       |  | 20-25 mm/min       |  |
|                              |                        |                    |  |                    |  |
|                              |                        |                    |  |                    |  |
| CUALITATIVA                  | Test de Ferning (TFT)  |                    |  |                    |  |
|                              | Break-up time (BUT)    | Segundos           |  | Segundos           |  |
|                              |                        | Test fluoresceína: |  | Test fluoresceína: |  |
|                              |                        | 0-5 s              |  | 0-5 s              |  |
|                              |                        | 5-10 s             |  | 5-10 s             |  |
|                              |                        | 10-15 s            |  | 10-15 s            |  |
|                              |                        | 15-20 s            |  | 15-20 s            |  |
|                              |                        |                    |  |                    |  |
| PAQUIMETRIA<br>En el lateral | Zona medial            |                    |  |                    |  |
|                              | Zona sin pigmento      |                    |  |                    |  |



**OTRAS OBSERVACIONES**

**CÓRNEA: PK**

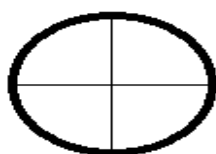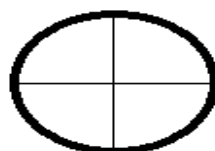

## SIGNOS CLÍNICOS E INDICADORES DE EFECTIVIDAD

|                                    | Ojo derecho (OD) |                  |                      |                     |              | Ojo izquierdo (OS) |                  |                      |                     |              |
|------------------------------------|------------------|------------------|----------------------|---------------------|--------------|--------------------|------------------|----------------------|---------------------|--------------|
|                                    | Ausencia<br>(1)  | Ligera<br>(2)    | Moderada<br>(3)      | Avanzada<br>(4)     | Grave<br>(5) | Ausencia<br>(1)    | Ligera<br>(2)    | Moderada<br>(3)      | Avanzada<br>(4)     | Grave<br>(5) |
| <b>SIGNOS CLINICOS</b>             |                  |                  |                      |                     |              |                    |                  |                      |                     |              |
| BLEFAROESPASMO                     |                  |                  |                      |                     |              |                    |                  |                      |                     |              |
| HIPEREMIA                          |                  |                  |                      |                     |              |                    |                  |                      |                     |              |
| PRURITO                            |                  |                  |                      |                     |              |                    |                  |                      |                     |              |
| EDEMA                              |                  |                  |                      |                     |              |                    |                  |                      |                     |              |
| INFILTRADO                         |                  |                  |                      |                     |              |                    |                  |                      |                     |              |
| VASOS                              |                  |                  |                      |                     |              |                    |                  |                      |                     |              |
| PIGMENTO EN<br>ESCLERA             |                  |                  |                      |                     |              |                    |                  |                      |                     |              |
| DESCARGA                           | Ausencia         | Serosa           | Mucosa               | Purulenta           |              | Ausencia           | Serosa           | Mucosa               | Purulenta           |              |
| <b>INDICADORES<br/>EFECTIVIDAD</b> |                  |                  |                      |                     |              |                    |                  |                      |                     |              |
| LINEA<br>TRANSPARENTE              | Ausencia<br>(1)  | Leve<br>(2)      | Moderada<br>(3)      | Intensa<br>(4)      |              | Ausencia<br>(1)    | Leve<br>(2)      | Moderada<br>(3)      | Intensa<br>(4)      |              |
| PIGMENTO<br>ACLARADO               | Sin<br>aclorado  | Aclarado<br>leve | Aclarado<br>moderado | Aclarado<br>intenso |              | Sin<br>aclorado    | Aclarado<br>leve | Aclarado<br>moderado | Aclarado<br>intenso |              |
| ÚLCERAS                            | Sí               |                  | No                   |                     |              | Sí                 |                  | No                   |                     |              |

**RECUPERACIÓN DE TRANSPARENCIA A LOS 6 MESES**

FECHA:    /    /

|                |  |
|----------------|--|
| Nombre         |  |
| Identificación |  |
| Propietario    |  |
| Producto       |  |

|                                              | Ojo derecho (OD) |      |          |         | Ojo izquierdo (OS) |      |          |         |
|----------------------------------------------|------------------|------|----------|---------|--------------------|------|----------|---------|
|                                              | No               | Leve | Moderada | Intensa | No                 | Leve | Moderada | Intensa |
| <b>Recuperación<br/>de<br/>Transparencia</b> |                  |      |          |         |                    |      |          |         |
